# Supplementary material
Source: PubMed Central journal article supplement (PMC2638414)
Supplement: djn176_1.pdf [file djn176_1.pdf]

Supplementary Table 1. Primers used for bisulfite-modified polymerase chain reaction

| Primer Set No. | Sense Primer (5'-3')                         | Antisense Primer (5'-3')                     | Product Size | Genomic Position |
|----------------|----------------------------------------------|----------------------------------------------|--------------|------------------|
| 1              | TTTAGGGTTTGTATGGGTTTATAG                     | CCCTCTCCAAAAAATTAATAA                        | 201          | -841             |
| 2              | TTTGAGAGGGGGTTAGGAA                          | CACCCGAACAAAACCAACC<br>CACCCAAACAAAACCAACC   | 182          | -651             |
| 3              | GGTTGGTTTTGTCGGGGTG<br>GGTTGGTTTTGTTGGGGTG   | AAAACAAATTAATAAATAATCCTAAACC                 | 193          | -489             |
| 4              | GGTTTAGGATTAGTTTTTAATTTGTTTT                 | CCTTAACCTACTCCCCGCAA<br>CCTTAACCTACTCCCCACAA | 236          | -325             |
| 5              | GTTTTGCGGGGAGTAGGTTA<br>GTTTTGTGGGGAGTAGGTTA | ATACCAACCTTAACCCGTAC<br>ATACCAACCTTAACCTGTAC | 161          | -112             |
| 6              | GTACGGGTTAAGGTTGGTAT<br>GTATGGGTTAAGGTTGGTAT | TCCTCATTCTCCATCTCCTC                         | 139          | +30              |
